# Supplementary material
Source: Springer Nature journal article supplement (https://www.springermedizin.de/resource/supplementary/13058_2008_2198_MOESM7_ESM.pdf/9700862)
Supplement: MOESM7 [file 9700862]

**Multivariate Cox regression of immune system related metagenes in relation to disease free survival of breast cancer patients (n=1263)**

| Metagene   |                          | P Value*     | HR    | (95% CI)        |
|------------|--------------------------|--------------|-------|-----------------|
| LCK        | high vs low <sup>§</sup> | <b>0.013</b> | 0.589 | (0.389 - 0.893) |
| HCK        | high vs low              | 0.447        | 1.150 | (0.802 - 1.651) |
| IgG        | high vs low              | 0.687        | 1.060 | (0.799 - 1.405) |
| MHC-II     | high vs low              | 0.998        | 1.001 | (0.620 - 1.615) |
| MHC-I      | high vs low              | 0.106        | 0.771 | (0.562 - 1.057) |
| STAT1      | high vs low              | 0.131        | 1.304 | (0.924 - 1.841) |
| Interferon | high vs low              | 0.543        | 1.085 | (0.834 - 1.411) |

\* significant values are given in bold type

<sup>§</sup> stratified by the highest quartile compared to the rest of the samples
